# Supplementary material
Source: PubMed Central journal article supplement (PMC7722179)
Supplement: NIHMS1631635-supplement-supplementary.pdf [file NIHMS1631635-supplement-supplementary.pdf]

# Comparison of parameter optimization methods for Quantitative Susceptibility Mapping

Carlos Milovic, Claudia Prieto, Berkin Bilgic, Sergio Uribe, Julio Acosta-Cabronero, Pablo Irarrazaval, Cristian Tejos

## Supplementary Material

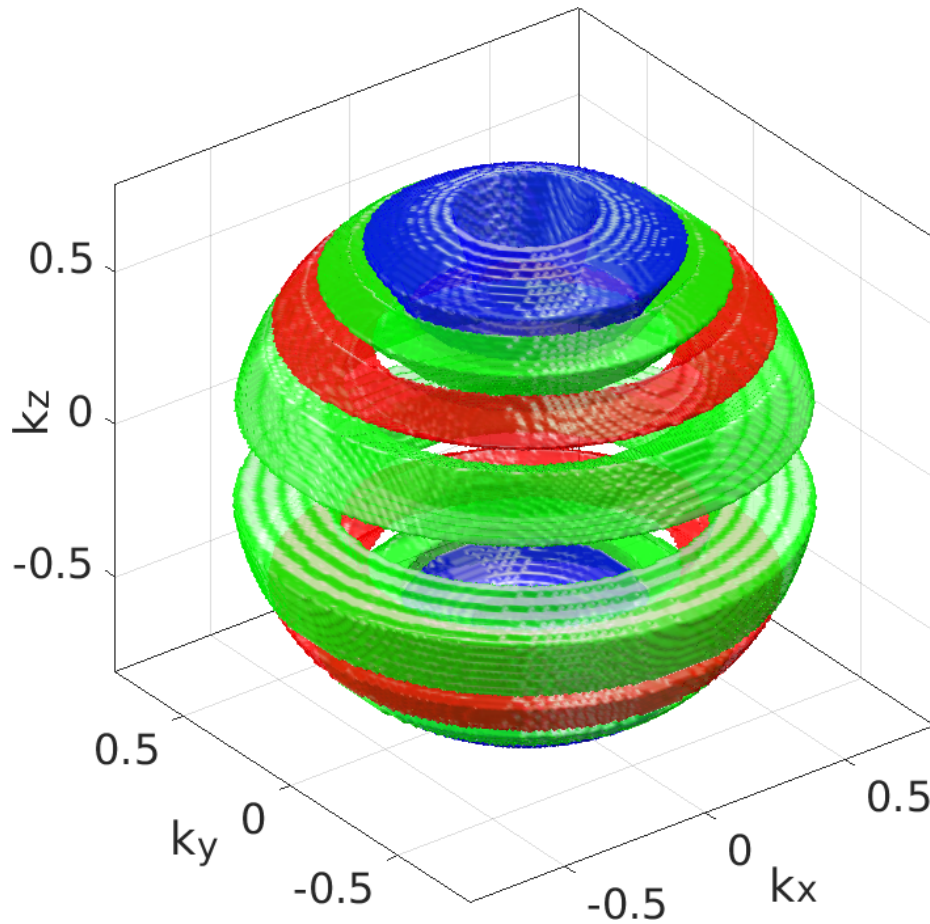

**Supporting Information Figure S1.** 3D representation of the ROIs used for the frequency analysis of susceptibility reconstructions. In red, M1:  $0 \leq |D| \leq 0.085$  at the magic angle. M2:  $0.15 \leq |D| \leq 0.3$  in green and M3:  $0.35 \leq |D| \leq 0.6$  in blue.

## Extended results

### COSMOS-brain numerical simulations (SNR=40)

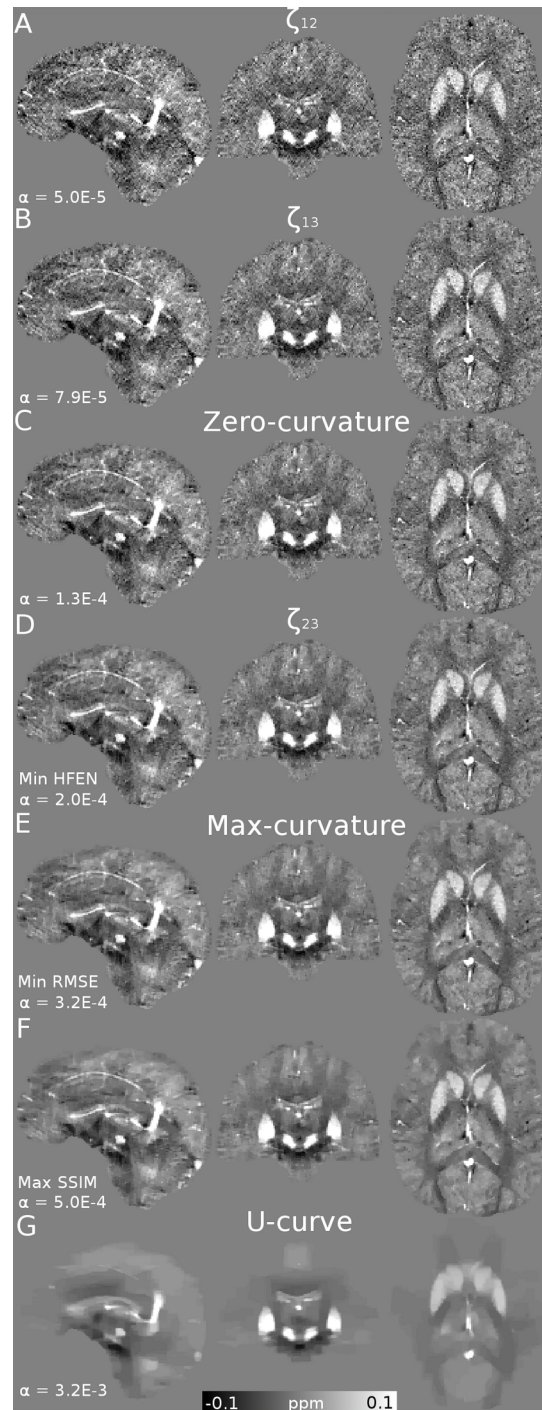

**Supporting Information Figure S2.** Optimal reconstructions and regularizations weights ( $\alpha$ ) of SNR=40 simulations, using the Frequency (A, B and D), L-curve (C, E) and U-curve analysis (G). Also represented here are the best scoring HFEN (D), RMSE (E) and SSIM (F) results.

## COSMOS-brain numerical simulations (SNR=128)

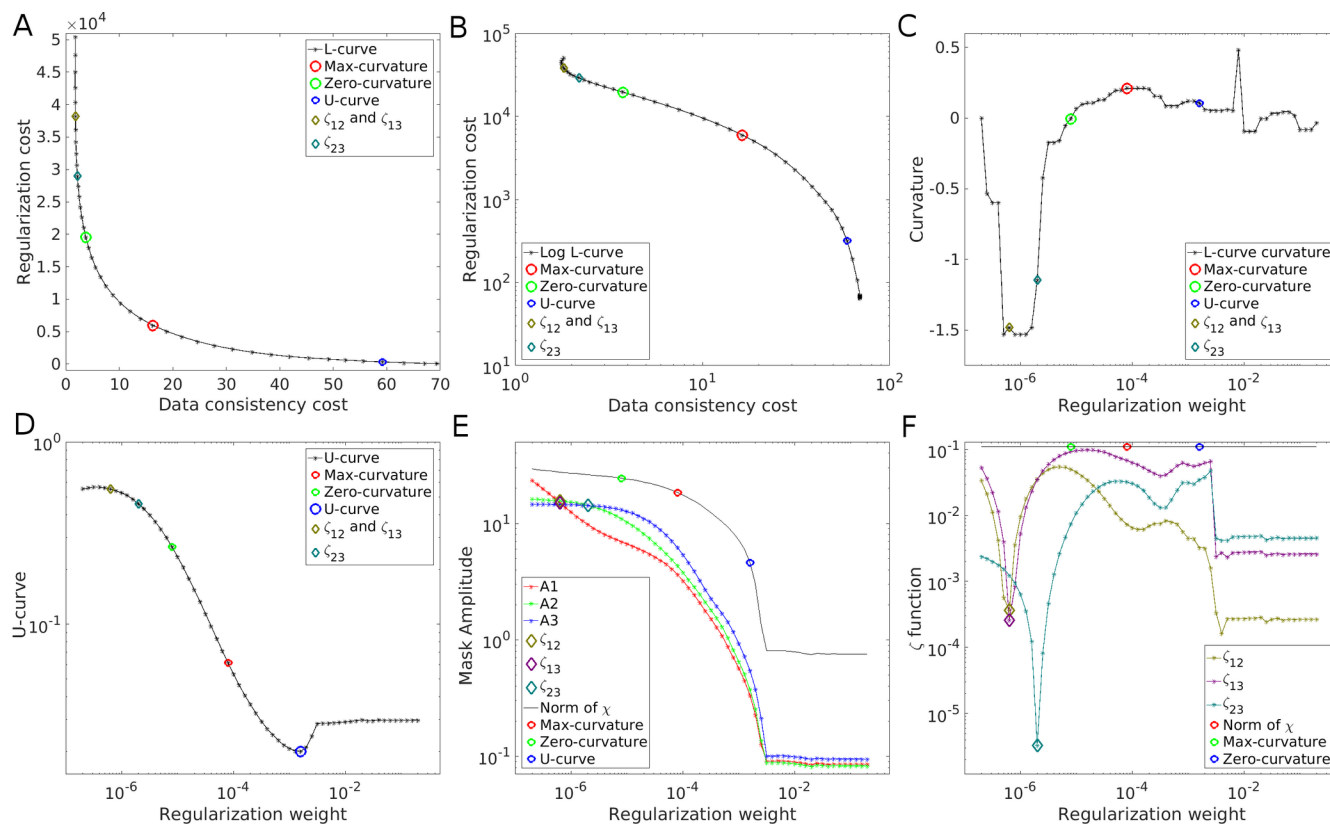

**Supporting Information Figure S3.** Parameter optimization strategies on the COSMOS-brain simulations at SNR=128. The L-curve in linear (A) and logarithm (B) representations, with its curvature (C). The U-curve (D). Frequency analysis using the amplitude estimations A1, A2 and A3 (E) and the  $\zeta$  cost functions (F).

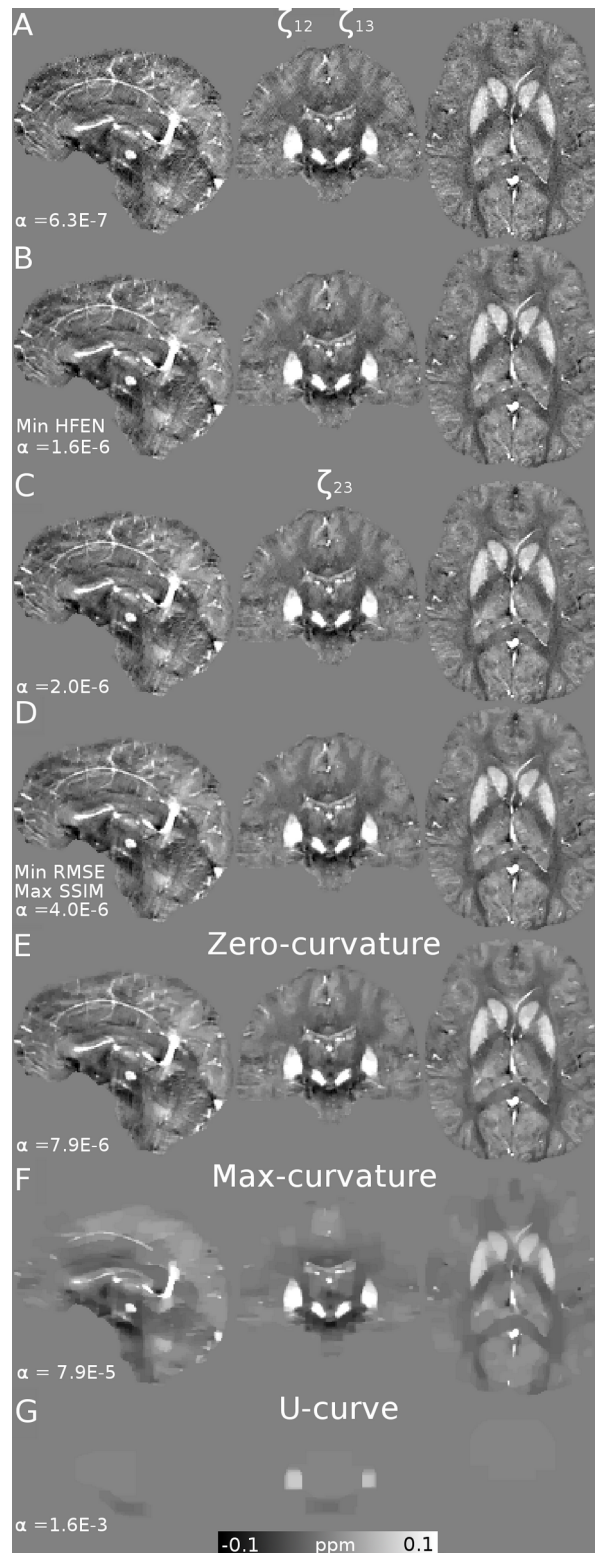

**Supporting Information Figure S4.** Optimal reconstructions and regularizations weights ( $\alpha$ ) of SNR=128 simulations, using the Frequency (A, C), L-curve (E, F) and U-curve analysis (G). Also represented here are the best scoring HFEN (B), RMSE and SSIM (D) results.

## In vivo results

### Single orientation – 2016 QSM-RC dataset.

#### Supplementary Information Table S1

Global metric scores (RMSE, HFEN, and SSIM) for the proposed reconstructions using COSMOS as ground truth.

|                        | $\zeta_{12} - \zeta_{13}$ | $\zeta_{23}$ | Zero Curv. | Max Curv. | U-curve  |
|------------------------|---------------------------|--------------|------------|-----------|----------|
| $\alpha$ (Reg. Weight) | 4.00E-06                  | 6.30E-06     | 2.50E-05   | 1.00E-04  | 1.00E-03 |
| RMSE                   | 105.8                     | 94.5         | 69.1       | 69.7      | 90.8     |
| HFEN                   | 108.8                     | 95.1         | 63.2       | 72.9      | 95.9     |
| SSIM                   | 0.818                     | 0.842        | 0.876      | 0.783     | 0.719    |

Please note that due to significant discrepancies between the single-orientation acquisition and the multi-orientation ground-truth used in the context of the QSM Challenge, over-regularized solutions tended to be promoted (achieve lower error scores). This was generated by the presence of anisotropic and micro-structural contributions not properly accounted in the provided ground-truths (Milovic et al, MRM 2020).

### 3T Siemens

**Acquisition and preprocessing details:** 3T Siemens Trio MRI system, 32-channel head-array, 1-mm<sup>3</sup> isotropic resolution, fully-sampled acquisition (no acceleration), 240×192×120 matrix, flip angle=25°, TE/TR=24.8/35 ms, bandwidth=100 Hz/pixel, T<sub>acq</sub>=13:30 min. Phase unwrapping and background subtraction were performed with Laplacian (30) and Laplacian boundary value (31) (LBV) methods, respectively.

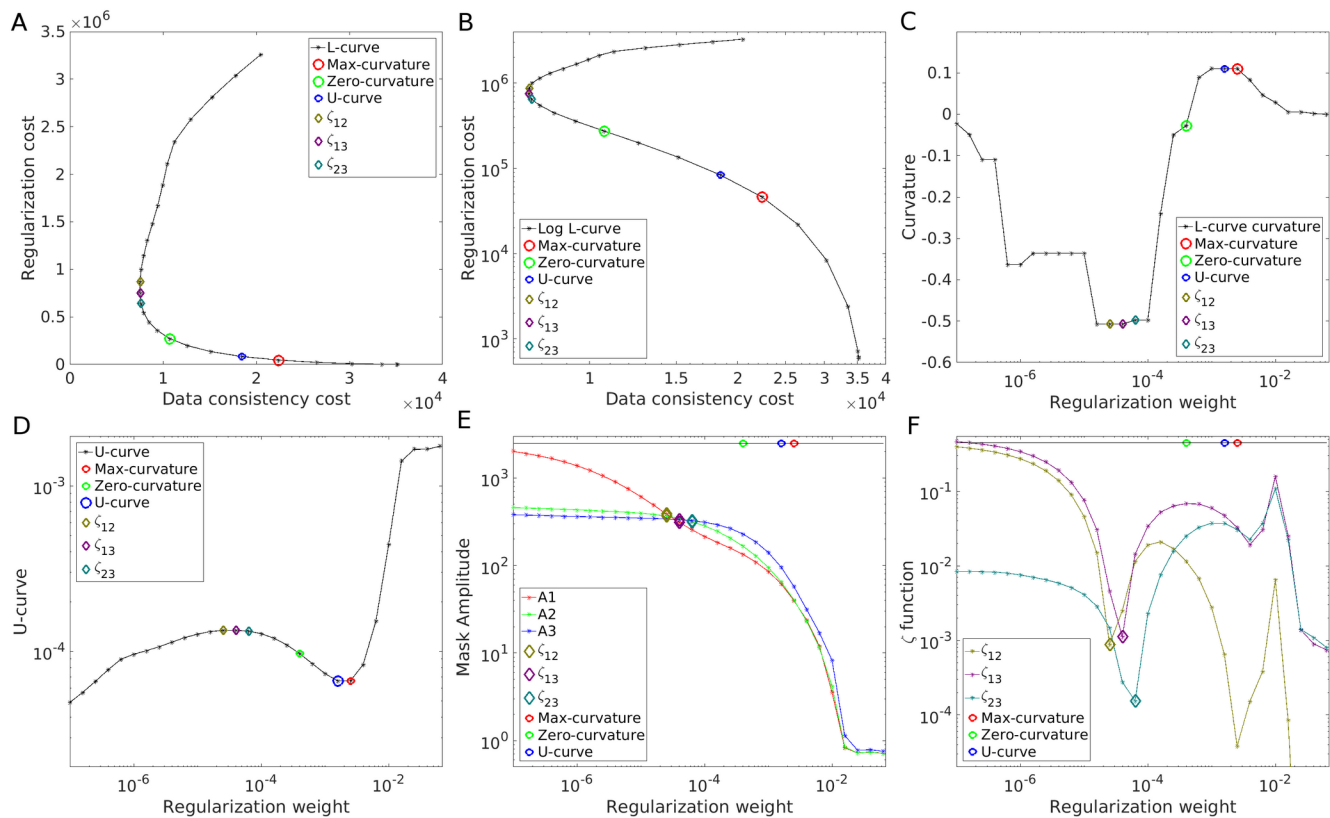

**Supporting Information Figure S5.** Parameter optimization strategies on the 3T Siemens in vivo data. The L-curve in linear (A) and logarithm (B) representations, with its curvature (C). The U-curve (D). Frequency analysis using the amplitude estimations A1, A2 and A3 (E) and the  $\zeta$  cost functions (F).

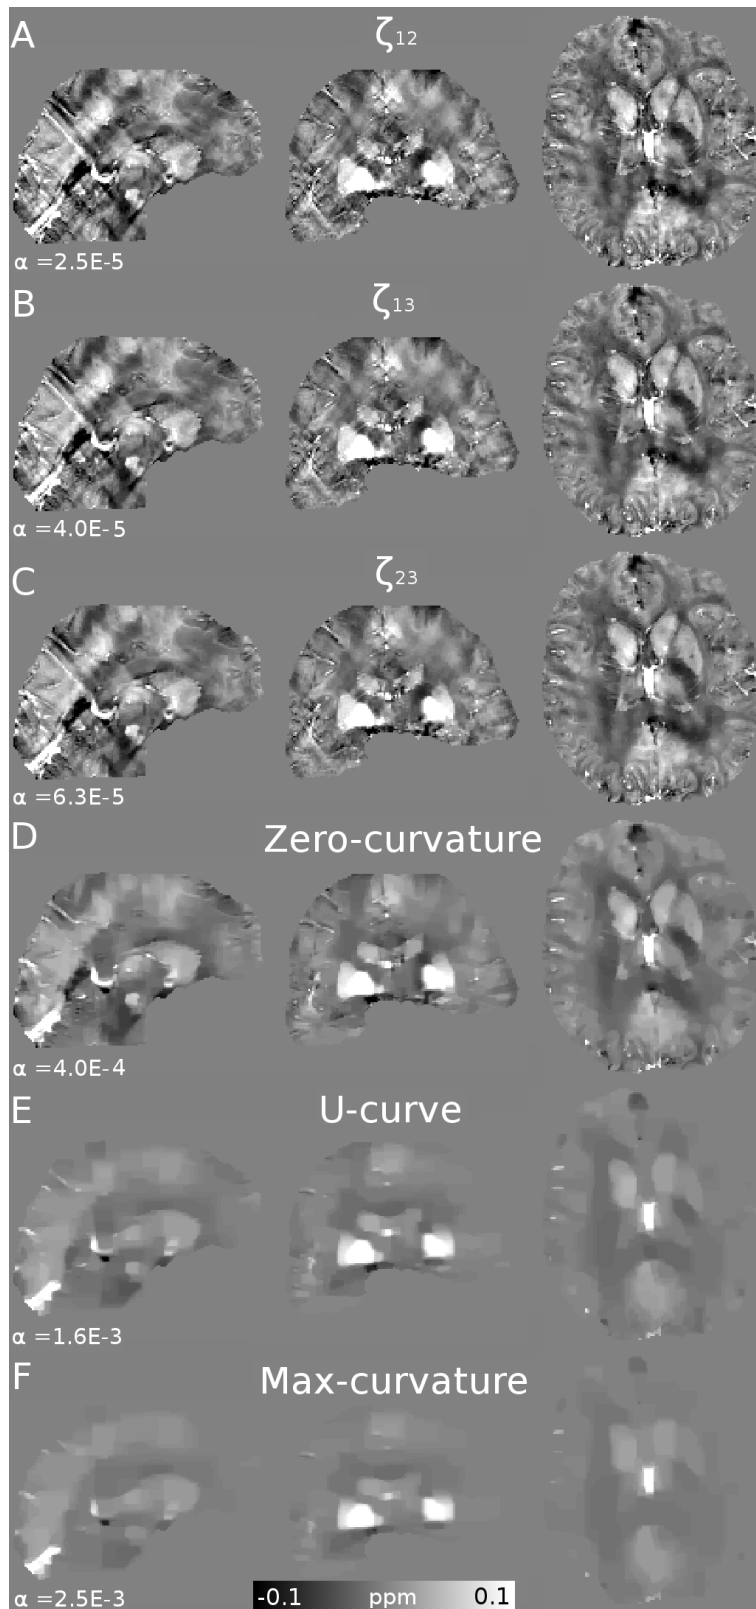

**Supporting Information Figure S6.** Optimal reconstructions and regularizations weights ( $\alpha$ ) of the 3T Siemens in vivo data, using the Frequency (A-C), L-curve (D, E) and U-curve analysis (F).



### 3T Phillips

**Acquisition and preprocessing details:** Phillips Ingenia 3T scanner. FFE sequence with 5 echoes. TE=7.2/6.2/32.1ms, TR=44ms, flip angle=17, 352×352×170 matrix with 0.6×0.6×1mm<sup>3</sup> voxels. T<sub>acq</sub>=6:30 min. Multi-echo combination and temporal unwrapping using in-house nonlinear method. Background field removal using LVB and a 4<sup>th</sup> order polynomial fit.

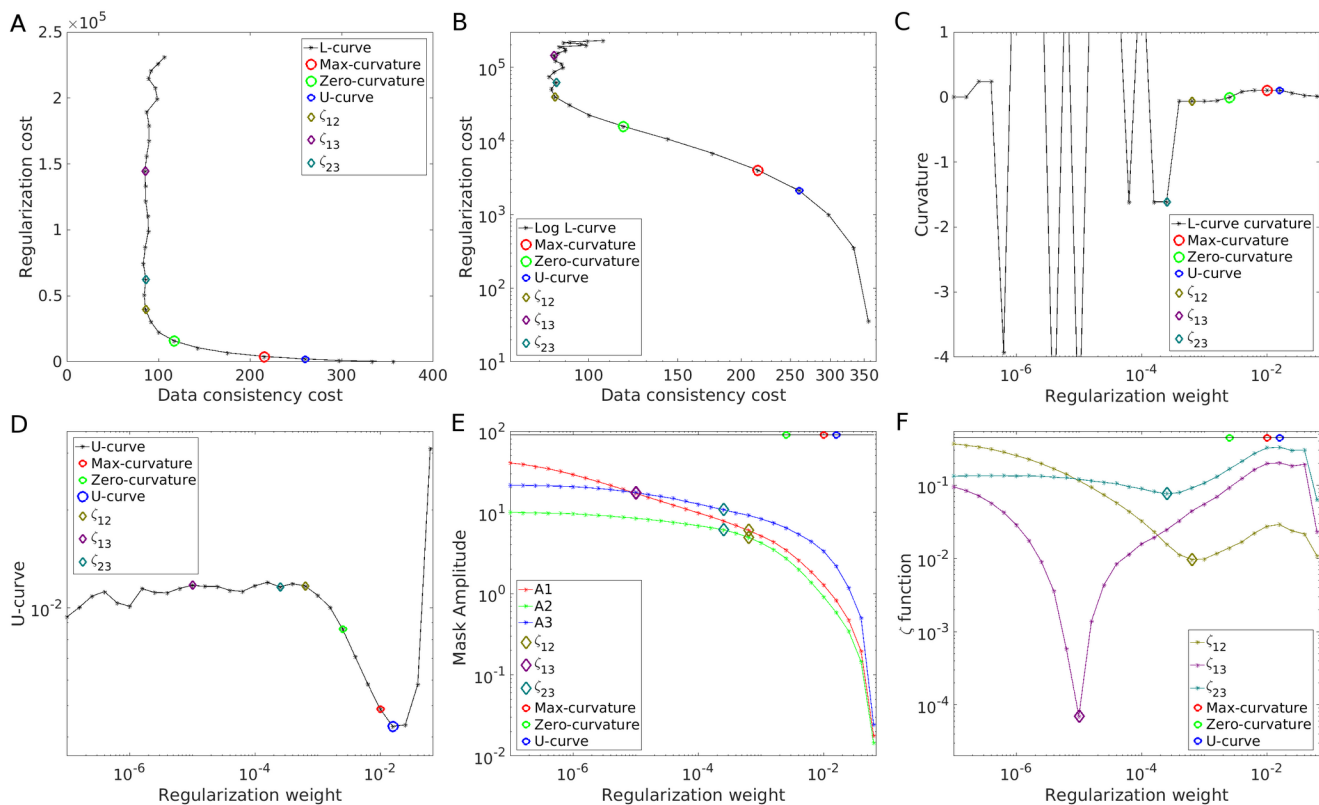

**Supporting Information Figure S7.** Parameter optimization strategies on the 3T Phillips in vivo data. The L-curve in linear (A) and logarithm (B) representations, with its curvature (C). The U-curve (D). Frequency analysis using the amplitude estimations A1, A2 and A3 (E) and the  $\zeta$  cost functions (F).



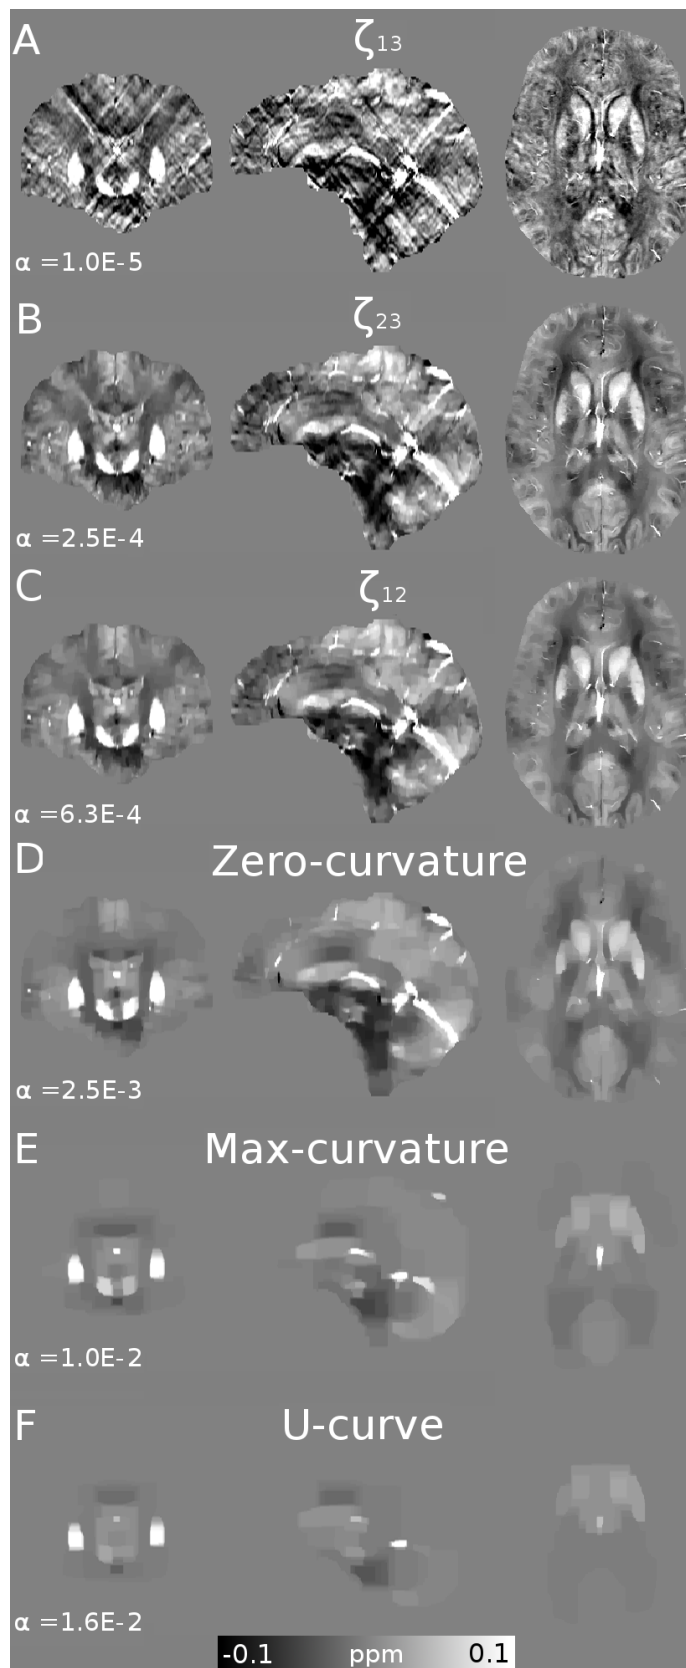

**Supporting Information Figure S8.** Optimal reconstructions and regularizations weights ( $\alpha$ ) of 3T Phillips in vivo data., using the Frequency (A-C), L-curve (D, E) and U-curve analysis (F).

## 7T Siemens (Anisotropic example)

Results with masks defined by relative ranges in frequencies.

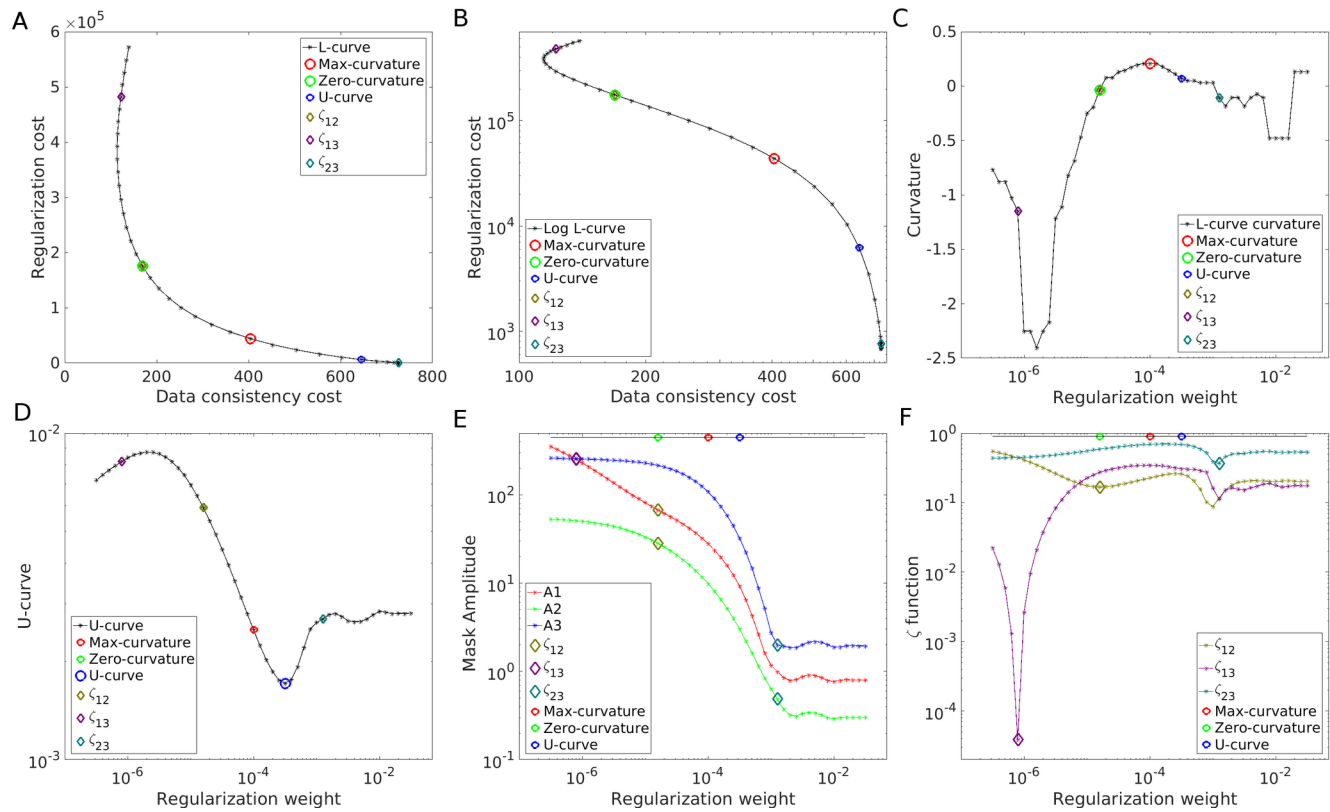

**Supporting Information Figure S9.** Parameter optimization strategies on the 37 Siemens in vivo data. The L-curve in linear (A) and logarithm (B) representations, with its curvature (C). The U-curve (D). Frequency analysis using the amplitude estimations A1, A2 and A3 (E) and the  $\zeta$  cost functions (F) with masks defined in a relative frequency range.

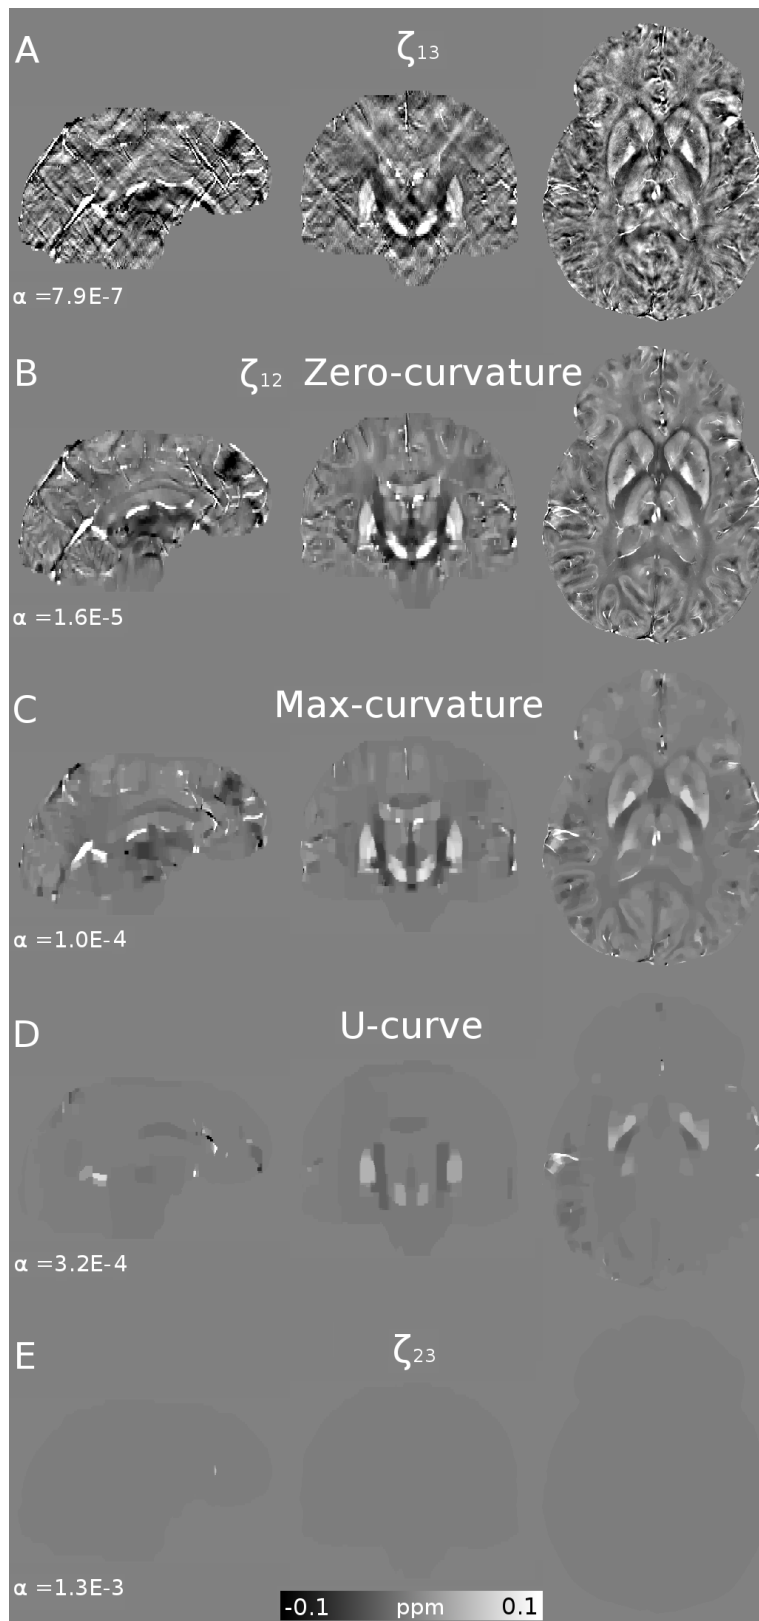

**Supporting Information Figure S10.** Optimal reconstructions and regularizations weights ( $\alpha$ ) of 7T Siemens in vivo data., using the Frequency (A, B, and E), L-curve (B, C), and U-curve analysis (D).
